# Supplementary material for: Morphological and Phylogenetic Characterization of Five Novel Nematode-Trapping Fungi (Orbiliomycetes) from Yunnan, China
Source: MDPI journal article supplement (doi:10.3390/jof9070735), 2023-07-07
Supplement: s1 [file s1]

**Table S1.** GenBank accession numbers involved in this study. Ex-type strains are in bold. The newly generated sequences are indicated in blue.

| Taxon                                | Strain Number        | GenBank accession Number |                 |                 |
|--------------------------------------|----------------------|--------------------------|-----------------|-----------------|
|                                      |                      | <i>ITS</i>               | <i>TEF</i>      | <i>RPB2</i>     |
| <i>Arthrobotrys amerospora</i>       | <b>CBS 268.83</b>    | <b>NR_159625</b>         | —               | —               |
| <i>Arthrobotrys anomala</i>          | YNWS02-5-1           | AY773451                 | AY773393        | AY773422        |
| <i>Arthrobotrys arthrobotryoides</i> | CBS 119.54           | MH857262                 | —               | —               |
| <i>Arthrobotrys arthrobotryoides</i> | AOAC                 | MF926580                 | —               | —               |
| <i>Arthrobotrys botryospora</i>      | <b>CBS 321.83</b>    | <b>NR_159626</b>         | —               | —               |
| <i>Arthrobotrys cladodes</i>         | 1.03514              | MH179793                 | MH179616        | MH179893        |
| <i>Arthrobotrys clavispora</i>       | <b>CBS 545.63</b>    | <b>MH858353</b>          | —               | —               |
| <i>Arthrobotrys conoides</i>         | 670                  | AY773455                 | AY773397        | AY773426        |
| <i>Arthrobotrys cookedickinson</i>   | YMF 1.00024          | MF948393                 | MF948550        | MF948474        |
| <i>Arthrobotrys cystosporia</i>      | CBS 439.54           | MH857384                 | —               | —               |
| <i>Arthrobotrys dendroides</i>       | YMF 1.00010          | MF948388                 | MF948545        | MF948469        |
| <i>Arthrobotrys dianchiensis</i>     | 1.00571              | MH179720                 | —               | MH179826        |
| <i>Arthrobotrys elegans</i>          | 1.00027              | MH179688                 | —               | MH179797        |
| <i>Arthrobotrys eryuanensis</i>      | <b>CGMCC 3.19715</b> | <b>MT612105</b>          | <b>OM850307</b> | <b>OM850301</b> |
| <i>Arthrobotrys eudermata</i>        | SDT24                | AY773465                 | AY773407        | AY773436        |
| <i>Arthrobotrys flagrans</i>         | 1.01471              | MH179741                 | MH179583        | MH179845        |
| <i>Arthrobotrys gampsospora</i>      | CBS 127.83           | U51960                   | —               | —               |
| <i>Arthrobotrys globospora</i>       | 1.00537              | MH179706                 | MH179562        | MH179814        |
| <i>Arthrobotrys gongshanensis</i>    | <b>CGMCC 3.23753</b> | <b>OM801277</b>          | <b>OM809162</b> | <b>OM809163</b> |
| <i>Arthrobotrys guizhouensis</i>     | YMF 1.00014          | MF948390                 | MF948547        | MF948471        |
| <i>Arthrobotrys hengjiangensis</i>   | <b>CGMCC 3.24983</b> | <b>OQ946587</b>          | <b>OQ989312</b> | <b>OQ989302</b> |
| <i>Arthrobotrys hengjiangensis</i>   | <b>XA190</b>         | <b>OQ946586</b>          | <b>OQ989311</b> | <b>OQ989301</b> |
| <i>Arthrobotrys indica</i>           | YMF 1.01845          | KT932086                 | —               | —               |
| <i>Arthrobotrys iridis</i>           | 521                  | AY773452                 | AY773394        | AY773423        |
| <i>Arthrobotrys janus</i>            | 85-1                 | AY773459                 | AY773401        | AY773430        |

|                                          |                      |                 |                 |                 |
|------------------------------------------|----------------------|-----------------|-----------------|-----------------|
| <i>Arthrobotrys javanica</i>             | 105                  | EU977514        | —               | —               |
| <b><i>Arthrobotrys jindingensis</i></b>  | <b>CGMCC 3.20895</b> | <b>OP236810</b> | <b>OP272511</b> | <b>OP272515</b> |
| <b><i>Arthrobotrys jinpingensis</i></b>  | <b>CGMCC 3.20896</b> | <b>OM855569</b> | <b>OM850311</b> | <b>OM850305</b> |
| <i>Arthrobotrys koreensis</i>            | C45                  | JF304780        | —               | —               |
| <b><i>Arthrobotrys lanpingensis</i></b>  | <b>CGMCC 3.20998</b> | <b>OM855566</b> | <b>OM850308</b> | <b>OM850302</b> |
| <i>Arthrobotrys latispora</i>            | H.B. 8952            | MK493125        | —               | —               |
| <i>Arthrobotrys longiphora</i>           | 1.00538              | MH179707        | —               | MH179815        |
| <b><i>Arthrobotrys lunzhangensis</i></b> | <b>CGMCC 3.20941</b> | <b>OK643973</b> | <b>OM621809</b> | <b>OM621810</b> |
| <b><i>Arthrobotrys luquanensis</i></b>   | <b>CGMCC 3.20894</b> | <b>OM855567</b> | <b>OM850309</b> | <b>OM850303</b> |
| <i>Arthrobotrys mangrovispora</i>        | MGDW17               | EU573354        | —               | —               |
| <i>Arthrobotrys megalospora</i>          | TWF800               | MN013995        | —               | —               |
| <i>Arthrobotrys microscaphoides</i>      | YMF 1.00028          | MF948395        | MF948552        | MF948476        |
| <b><i>Arthrobotrys multiformis</i></b>   | <b>CBS 773.84</b>    | <b>MH861834</b> | —               | —               |
| <i>Arthrobotrys musiformis</i>           | SQ77-1               | AY773469        | AY773411        | AY773440        |
| <i>Arthrobotrys musiformis</i>           | 1.03481              | MH179783        | MH179607        | MH179883        |
| <b><i>Arthrobotrys nonseptata</i></b>    | <b>YMF 1.01852</b>   | <b>FJ185261</b> | —               | —               |
| <b><i>Arthrobotrys obovata</i></b>       | <b>YMF 1.00011</b>   | <b>MF948389</b> | <b>MF948546</b> | <b>MF948470</b> |
| <i>Arthrobotrys oligospora</i>           | 920                  | AY773462        | AY773404        | AY773433        |
| <i>Arthrobotrys paucispora</i>           | ATCC 96704           | EF445991        | —               | —               |
| <i>Arthrobotrys polycephala</i>          | 1.01888              | MH179760        | MH179592        | MH179862        |
| <i>Arthrobotrys pseudoclavata</i>        | 1130                 | AY773446        | AY773388        | AY773417        |
| <i>Arthrobotrys psychrophila</i>         | 1.01412              | MH179727        | MH179578        | MH179832        |
| <i>Arthrobotrys pyriformis</i>           | YNWS02-3-1           | AY773450        | AY773392        | AY773421        |
| <i>Arthrobotrys reticulata</i>           | CBS 550.63           | MH858355        | —               | —               |
| <i>Arthrobotrys robusta</i>              | nefuA4               | MZ326655        | —               | —               |
| <i>Arthrobotrys salina</i>               | SF 0459              | KP036623        | —               | —               |
| <i>Arthrobotrys</i>                      | 1.01442              | MH179732        | MH179580        | MH179836        |

|                              |                      |                 |                 |                 |
|------------------------------|----------------------|-----------------|-----------------|-----------------|
| <i>scaphoides</i>            |                      |                 |                 |                 |
| <i>Arthrobotrys</i>          | YMF 1.00022          | MF948392        | MF948549        | MF948473        |
| <i>shizishanna</i>           |                      |                 |                 |                 |
| <b><i>Arthrobotrys</i></b>   | <b>CGMCC 3.19716</b> | <b>MT612334</b> | <b>OM850306</b> | <b>OM850300</b> |
| <b><i>shuifuensis</i></b>    |                      |                 |                 |                 |
| <i>Arthrobotrys sinensis</i> | 105-1                | AY773445        | AY773387        | AY773416        |
| <i>Arthrobotrys</i>          | 1.01410              | MH179726        | MH179577        | MH179831        |
| <i>sphaeroides</i>           |                      |                 |                 |                 |
| <i>Arthrobotrys superba</i>  | 127                  | EU977558        | —               | —               |
| <i>Arthrobotrys</i>          | 917                  | AY773461        | AY773403        | AY773432        |
| <i>thaumasia</i>             |                      |                 |                 |                 |
| <b><i>Arthrobotrys</i></b>   | <b>CGMCC 3.20942</b> | <b>OP236809</b> | <b>OP272509</b> | <b>OP272513</b> |
| <b><i>tongdianensis</i></b>  |                      |                 |                 |                 |
| <i>Arthrobotrys</i>          | 629                  | AY773454        | AY773396        | AY773425        |
| <i>vermicola</i>             |                      |                 |                 |                 |
| <b><i>Arthrobotrys</i></b>   | <b>CGMCC 3.24984</b> | <b>OQ946585</b> | <b>OQ989310</b> | <b>OQ989300</b> |
| <b><i>weixiensis</i></b>     |                      |                 |                 |                 |
| <b><i>Arthrobotrys</i></b>   | <b>FA675</b>         | <b>OQ946584</b> | <b>OQ989309</b> | <b>OQ989299</b> |
| <b><i>weixiensis</i></b>     |                      |                 |                 |                 |
| <i>Arthrobotrys</i>          | YXY10-1              | MK537299        | —               | —               |
| <i>xiangyunensis</i>         |                      |                 |                 |                 |
| <i>Arthrobotrys</i>          | YMF 1.00593          | AY50993         | —               | —               |
| <i>yunnanensis</i>           |                      |                 |                 |                 |
| <i>Arthrobotrys</i>          | CGMCC 3.20944        | OM855568        | OM850310        | OM850304        |
| <i>zhaoyangensis</i>         |                      |                 |                 |                 |
| <i>Dactylellina</i>          | CGMCC 3.19714        | MK372062        | MN915115        | MN915114        |
| <i>cangshanensis</i>         |                      |                 |                 |                 |
| <i>Dactylellina</i>          | CBS 487.90           | U51964          | DQ999835        | DQ999816        |
| <i>coepodii</i>              |                      |                 |                 |                 |
| <i>Dactylellina</i>          | CBS 229.54           | AY902794        | DQ999843        | DQ999817        |
| <i>mammillata</i>            |                      |                 |                 |                 |
| <i>Dactylellina</i>          | CGMCC 3.19713        | MK372061        | MN915113        | MN915112        |
| <i>yushanensis</i>           |                      |                 |                 |                 |
| <i>Drechlerella</i>          | expo-5               | AY773463        | AY773405        | AY773434        |
| <i>dactyloides</i>           |                      |                 |                 |                 |
| <i>Drechlerella</i>          | CBS 109.37           | AY965753        | —               | —               |
| <i>anchonia</i>              |                      |                 |                 |                 |
| <i>Drechlerella</i>          | YMF 1.00119          | MF948397        | —               | MF948477        |
| <i>aphrobrocha</i>           |                      |                 |                 |                 |
| <i>Drechlerella</i>          | 1.01429              | MH179731        | —               | MH179835        |
| <i>bembicodes</i>            |                      |                 |                 |                 |
| <i>Drechlerella</i>          | CBS 218.61           | U51950          | —               | —               |
| <i>brochopaga</i>            |                      |                 |                 |                 |
| <i>Drechlerella</i>          | BCRC 34361           | FJ380936        | —               | —               |
| <i>brochopaga</i>            |                      |                 |                 |                 |
| <i>Drechlerella</i>          | FWY03-25-1           | AY773464        | AY773406        | AY773435        |
| <i>coelobrocha</i>           |                      |                 |                 |                 |
| <i>Drechlerella</i>          | 1.00031              | MH179690        | MH179554        | MH179799        |
| <i>dactyloides</i>           |                      |                 |                 |                 |
| <b><i>Drechlerella</i></b>   | <b>CGMCC 3.20131</b> | <b>MT592896</b> | <b>OK556701</b> | <b>OK638157</b> |
| <b><i>daliensis</i></b>      |                      |                 |                 |                 |

|                                           |                      |                  |                 |                 |
|-------------------------------------------|----------------------|------------------|-----------------|-----------------|
| <i>Drechslerella doedycoides</i>          | YMF 1.00553          | MF948401         | —               | MF948481        |
| <i>Drechslerella doedycoides</i>          | CBS 175.55           | MH857432         | —               | —               |
| <i>Drechslerella effusa</i>               | YMF 1.00583          | MF948405         | MF948557        | MF948484        |
| <i>Drechslerella effusa</i>               | CBS 774.84           | MH861835         | —               | —               |
| <b><i>Drechslerella hainanensis</i></b>   | <b>YMF 1.03993</b>   | <b>KC952010</b>  | —               | —               |
| <i>Drechslerella heterospora</i>          | YMF 1.00550          | MF948400         | MF948554        | MF948480        |
| <b><i>Drechslerella pengdangensis</i></b> | <b>CGMCC 3.24985</b> | <b>OQ946589</b>  | <b>OQ989314</b> | <b>OQ989304</b> |
| <b><i>Drechslerella pengdangensis</i></b> | <b>DL53</b>          | <b>OQ946588</b>  | <b>OQ989313</b> | <b>OQ989303</b> |
| <i>Drechslerella polybrocha</i>           | CCRC 32872           | U51973           | —               | —               |
| <i>Drechslerella polybrocha</i>           | DHP 133              | U72606           | —               | —               |
| <i>Drechslerella polybrocha</i>           | H.B. 8317            | KT222361         | —               | —               |
| <i>Drechslerella stenobrocha</i>          | YNWS02-9-1           | AY773460         | AY773402        | AY773431        |
| <b><i>Drechslerella tianchiensis</i></b>  | <b>CGMCC 3.24986</b> | <b>OQ946591</b>  | <b>OQ989316</b> | <b>OQ989306</b> |
| <b><i>Drechslerella tianchiensis</i></b>  | <b>XJ353</b>         | <b>OQ946590</b>  | <b>OQ989315</b> | <b>OQ989305</b> |
| <i>Drechslerella xiaguanensis</i>         | CGMCC 3.20132        | MT592900         | OK556699        | OK638159        |
| <b><i>Drechslerella yunlongensis</i></b>  | <b>CGMCC 3.20946</b> | <b>OM956086</b>  | <b>OQ989318</b> | <b>OQ989308</b> |
| <b><i>Drechslerella yunlongensis</i></b>  | <b>YL402</b>         | <b>OQ946592</b>  | <b>OQ989317</b> | <b>OQ989307</b> |
| <i>Drechslerella yunnanensis</i>          | 1.01863              | MH179759         | —               | MH179861        |
| <i>Drechslerella yunnanensis</i>          | YMF 1.03216          | HQ711927         | —               | —               |
| <b><i>Orbilina jesu-laurae</i></b>        | <b>LQ59a</b>         | <b>MN816816</b>  | —               | —               |
| <i>Orbilina orientalis</i>                | H.B.9925             | KT222412         | —               | —               |
| <i>Orbilina orientalis</i>                | H.B.9965             | KT380104         | —               | —               |
| <b><i>Orbilina pseudopolybrocha</i></b>   | <b>YMF 1.02660</b>   | <b>NR_172380</b> | —               | —               |
| <b><i>Orbilina tonghaiensis</i></b>       | <b>YMF 1.03006</b>   | <b>NR_172397</b> | <b>MF948570</b> | <b>MF948496</b> |
| <i>Vermispora fusarina</i>                | YXJ02-13-5           | AY773447         | AY773389        | AY773418        |
| <i>Vermispora leguminacea</i>             | AS 6.0291            | DQ494376         | —               | —               |

---

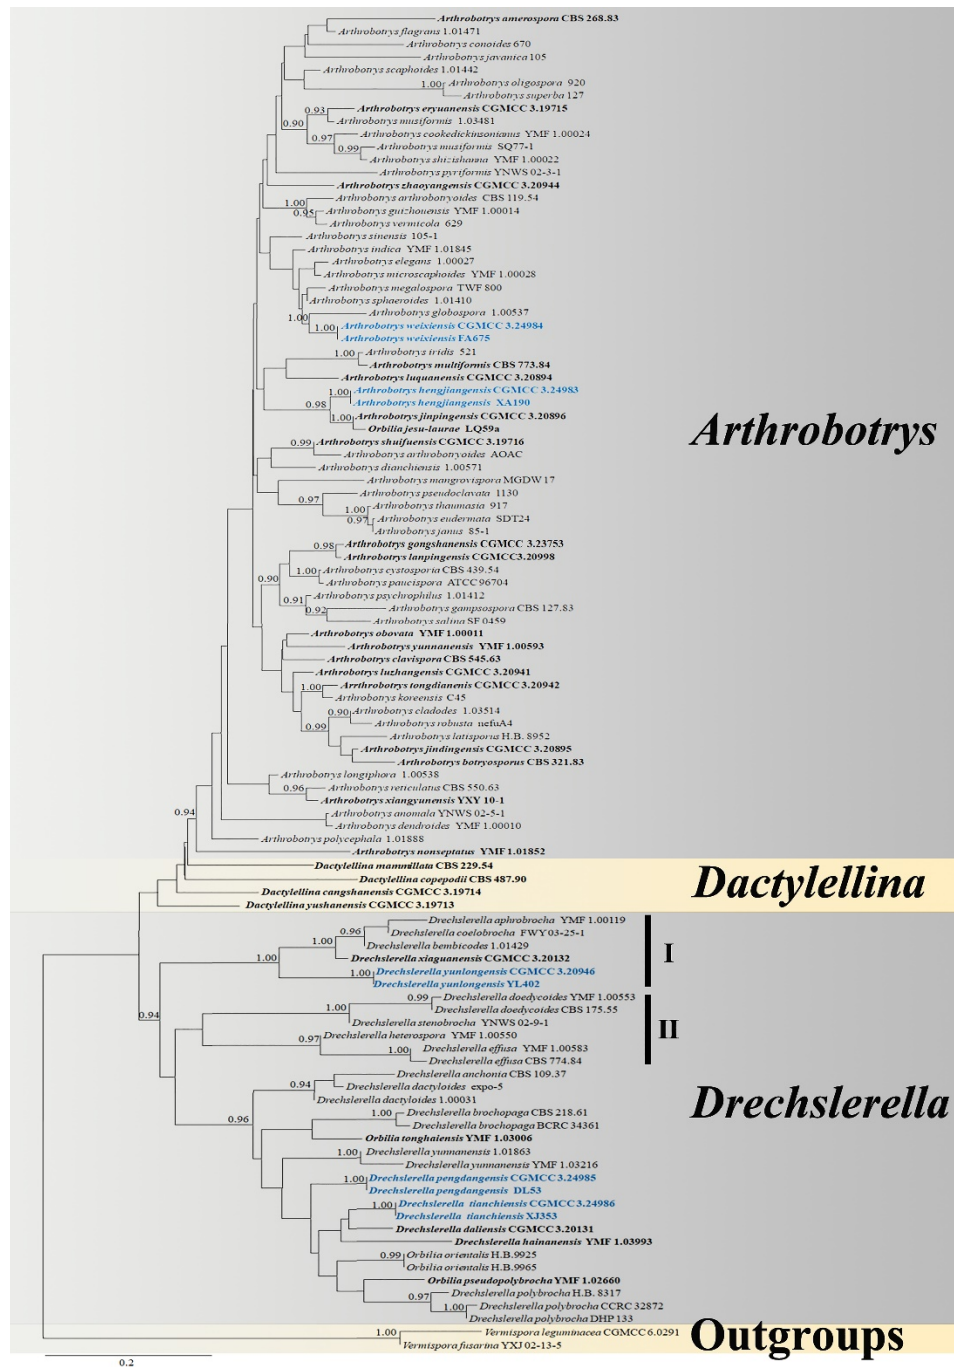

**Figure S1.** Bayesian majority rule consensus tree based on a combined *ITS*, *TEF* and *RPB2* sequence data from 87 species of Orbiliaceae nematode-trapping fungi. Bayesian posterior probabilities values equal or greater than 0.90 are indicated above the nodes. The new isolates are in blue, type strains are in bold. The tree is rooted by *Vermispora fusarina* YXJ02-13-5 and *V. leguminacea* AS 6.0291.
